# Supplementary material for: EaMIC3 inhibits cell apoptosis and facilitates Eimeria acervulina infection through interacting with EpCAM
Source: Research Square preprint supplement (doi:10.21203/rs.3.rs-7302653/v1), 2025-08-25
Supplement: Supplementary file 1 [file 239644fe2f36eb0c89813f5f.docx]

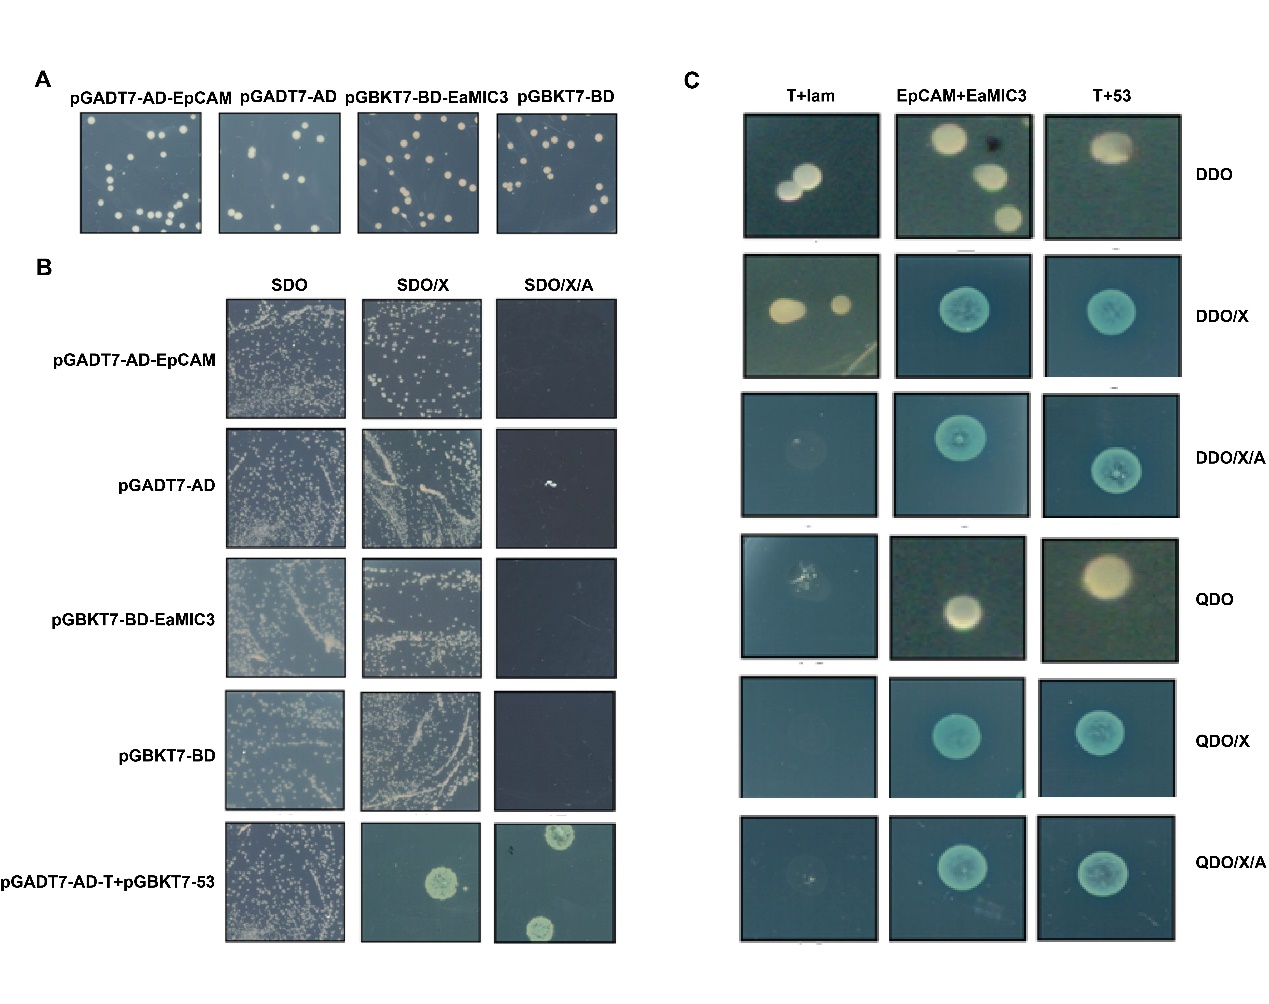


Fig. S1. Interaction between EaMIC3 and EpCAM identified by yeast two-hybrid test

A. Toxic detection of recombinant plasmid in yeasts. B. The autoactivation detection of pGADT7-AD-EpCAM and pGBKT7-BD-EaMIC3. C. α-galactosidase activity of the transformants. pGBKT7-53 + pGADT7-T and pGBKT7-Lam + pGADT7-T were used as positive control and negative control, respectively. SDO/X/A, SD/-Trp/X-α-gal/AbA or SD/-Leu/X-α-gal/AbA; DDO /X/A, DD/-Leu/-Trp/X-α-gal/AbA; QDO /X/A, DD/-Ade/-His/-Leu/-Trp/X-α-gal/AbA.


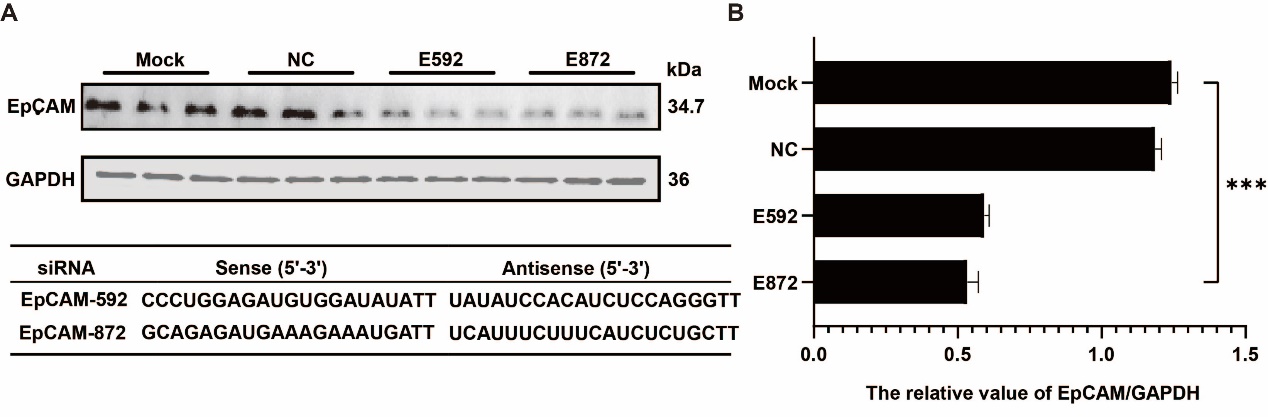


Fig. S2. Screening of siRNAs against EpCAM

A. Detection of EpCAM expression after transfecting siRNAs using Western blotting; B. The relative values of EpCAM/GAPDH after transfection. NC, negative control; ‘***’, *P* < 0.001.
